# Supplementary material for: Surface functionalized nanoscale metal oxides for arsenic(v), chromium(vi), and uranium(vi) sorption: considering single- and multi-sorbate dynamics
Source: Royal Society of Chemistry journal article supplement (doi:10.1039/d0en00728e), 2020-01-01
Supplement: d0en00728e1.pdf [file d0en00728e1.pdf]

Electronic Supplementary Information

# Surface Functionalized Nanoscale Metal Oxides for Arsenic (V), Chromium (VI), and Uranium (VI) Sorption: Considering Single- and Multi- Sorbate Dynamics

Changwoo Kim<sup>a</sup>, Seung Soo Lee<sup>b</sup>, Kit Tan Kwan<sup>c</sup>, Junseok Lee<sup>a</sup>, Wenlu Li<sup>a</sup>, Brandon J.

Lafferty<sup>d</sup>, Daniel E. Giammar<sup>b</sup>, and John D. Fortner<sup>a,\*</sup>

<sup>a</sup> Department of Chemical and Environmental Engineering, Yale University, New Haven, CT, 06520, United States

<sup>b</sup> Department of Energy, Environmental, and Chemical Engineering, Washington University in St. Louis, St. Louis, MO, 63130, United States

<sup>c</sup> Department of Civil and Environmental Engineering, The Hong Kong University of Science & Technology, Clear Water Bay, Kowloon, Hong Kong

<sup>d</sup> U.S. Army Corps of Engineers, Engineer Research and Development Center, Vicksburg, MS, 39180, United States

\*To whom correspondence should be addressed:

John D. Fortner: Tel: +1-314-935-9293; Email: [john.fortner@yale.edu](mailto:john.fortner@yale.edu)

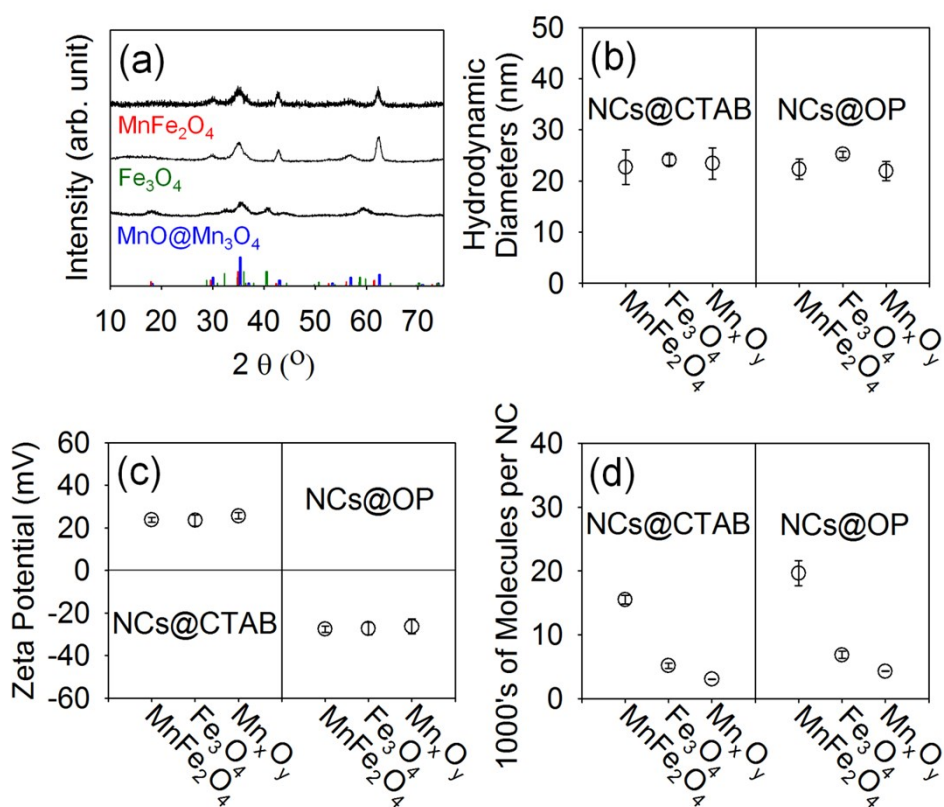

Fig. S1. (a) XRD of manganese iron oxide, iron oxide, and manganese oxide NCs. Diffraction patterns matched with  $\text{MnFe}_2\text{O}_4$  (JCPDS Card # 380430),  $\text{Fe}_3\text{O}_4$  (JCPDS Card # 190629), and  $\text{MnO}$  core (JCPDS Card # 070230) with  $\text{Mn}_3\text{O}_4$  shell structure (JCPDS Card # 240734), respectively. Water disperse synthesized NCs coated with cetyltrimethylammonium bromide (CTAB) and oleyl phosphate (OP) were characterized; (b) hydrodynamic diameters at pH 7, (c) zeta potential at pH 7, and (d) number of organic molecules loaded on the NC surface.

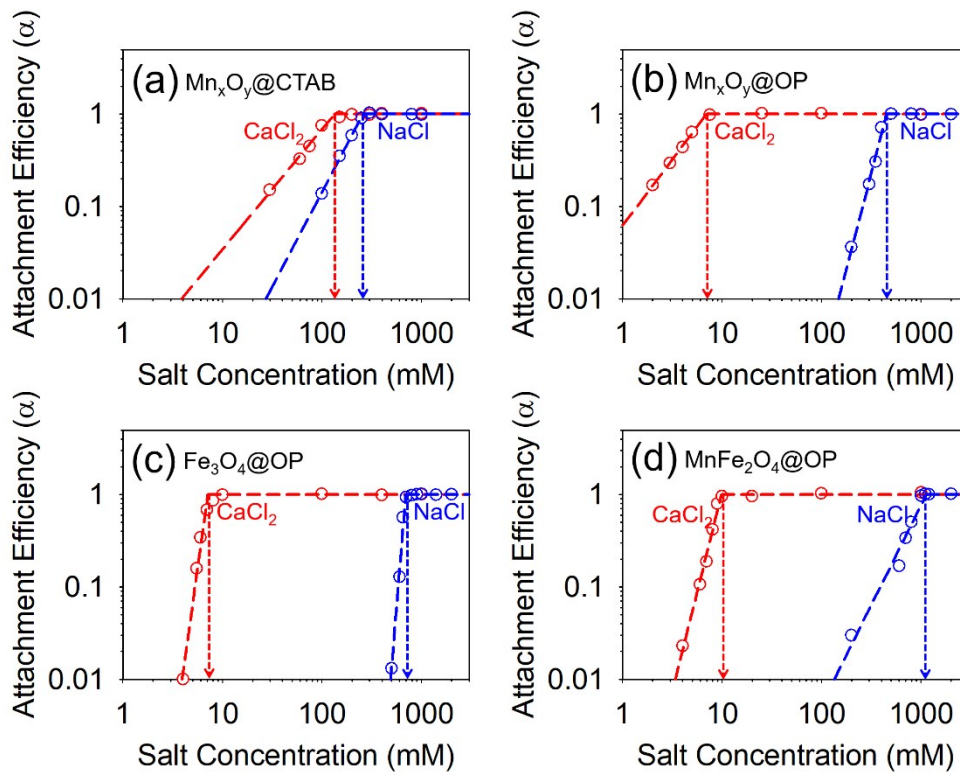

Fig. S2. Critical coagulation concentration (CCC) of water dispersed metal oxide NCs was determined by measuring attachment efficiency as a function of salt concentration ( $\text{NaCl}$  (blue) and  $\text{CaCl}_2$  (red)); (a)  $\text{Mn}_x\text{O}_y@CTAB$ , (b)  $\text{Mn}_x\text{O}_y@OP$ , (c)  $\text{Fe}_3\text{O}_4@OP$ , and (d)  $\text{MnFe}_2\text{O}_4@OP$ .

All CCC measurements were tested at pH 7.0.

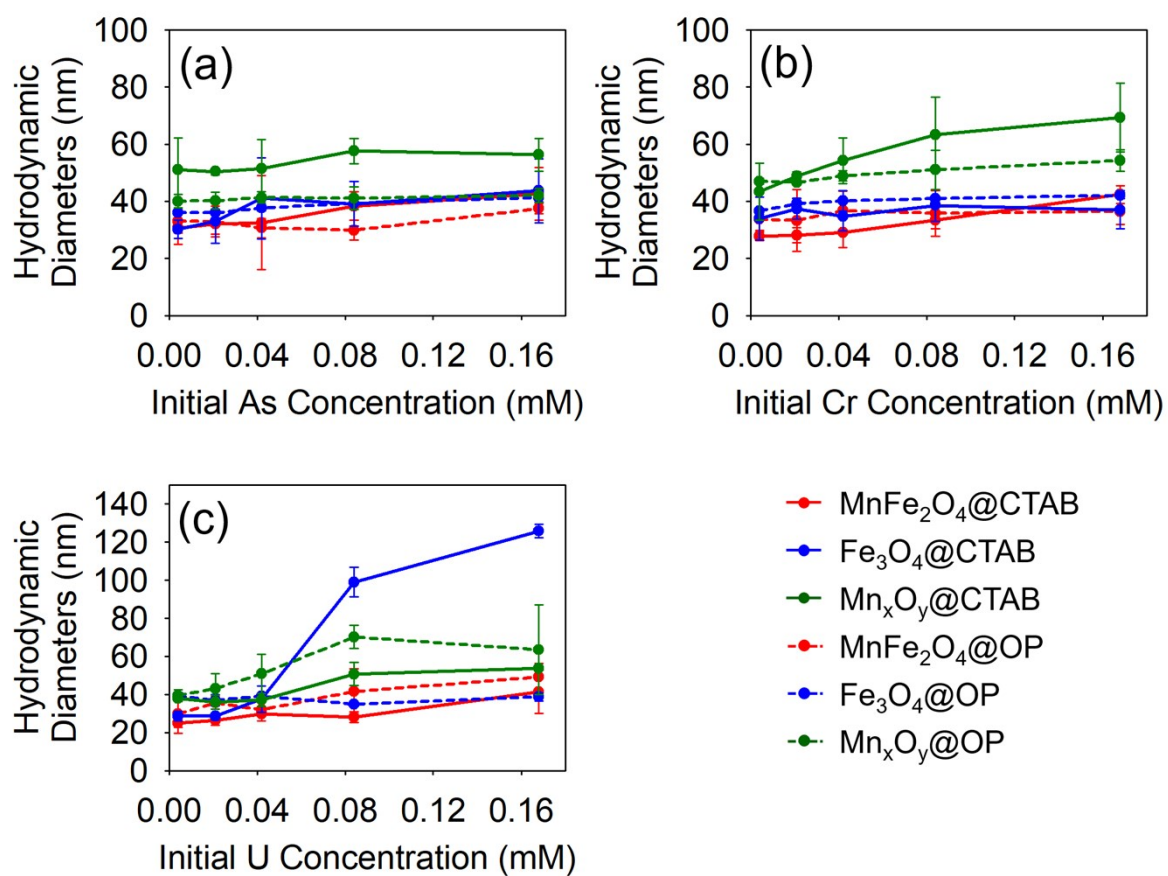

Fig. S3. Hydrodynamic diameter of CTAB (solid line) and OP (dotted line) functionalized metal oxide (MnFe<sub>2</sub>O<sub>4</sub> (red), Fe<sub>3</sub>O<sub>4</sub> (blue), and Mn<sub>x</sub>O<sub>y</sub> (red)) NCs after (a) As(V), (b) Cr(VI), and (c) U(VI) sorption experiments.

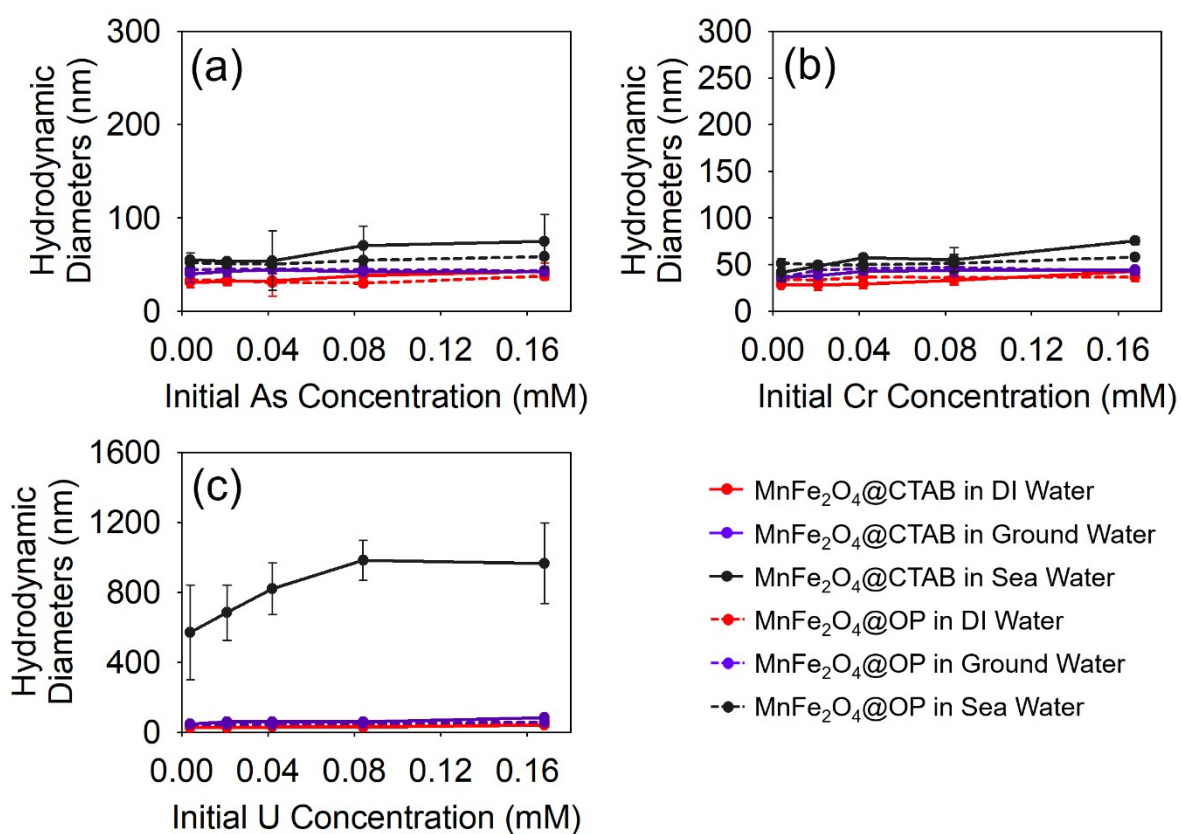

Fig. S4. Hydrodynamic diameter of CTAB (solid line) and OP (dotted line) functionalized MnFe<sub>2</sub>O<sub>4</sub> NCs after (a) As(V), (b) Cr(VI), and (c) U(VI) sorption experiments in DI water (red), ground water (purple), and sea water (black); MnFe<sub>2</sub>O<sub>4</sub>@OP precipitated after uranyl sorption in sea water conditions.

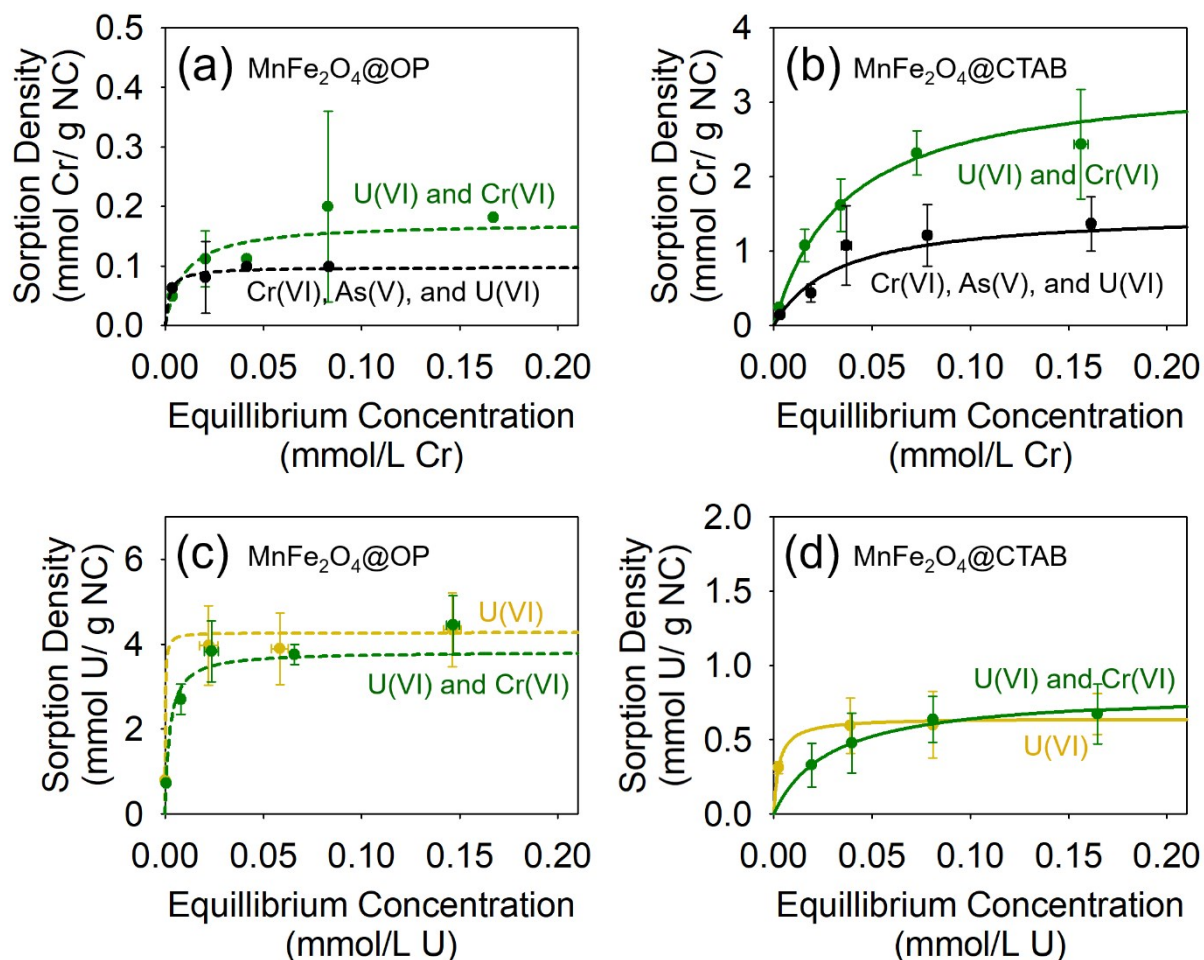

Fig. S5. Single- and multi-sorbate sorption isotherm on MnFe<sub>2</sub>O<sub>4</sub> NCs coated with CTAB (solid line) or OP (dotted line); single sorbate systems (U(VI) (yellow)) and multi sorbate systems (Cr(VI) and U(VI) (green); and As(V), Cr(VI), and U(VI) (black)). Experiments were conducted in DI water at pH 7.0 ± 0.2. Dot plots with error bars and line plots present experiment measurement values with standard deviations and Langmuir isotherm fittings, respectively.

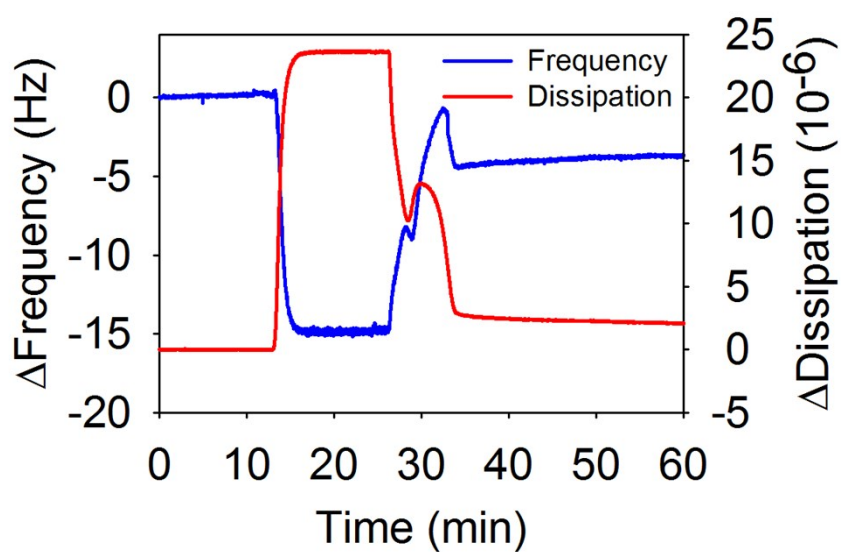

Fig. S6. Time dependent frequency (blue) and dissipation (red) shifts for Q-sensor with overtone ( $n = 3$ ). The DI stabilized Q-sensor was coated by PDDA solution (after 12 min) and further stabilized for 15 min. Then the PDDA coated Q-sensor was restabilized with DI water at pH 7 (for 27 min to 60 min).

Table S1. Maximum sorption capacity per number of surfactant (or functional group as either amine or phosphate).

| Nanocrystals                          | Maximum sorption capacity per number of surfactant (dimensionless) |          |         |
|---------------------------------------|--------------------------------------------------------------------|----------|---------|
|                                       | Arsenic                                                            | Chromium | Uranium |
| $\text{Mn}_x\text{O}_y\text{@CTAB}$   | 0.21                                                               | 0.30     | 0.46    |
| $\text{Fe}_3\text{O}_4\text{@CTAB}$   | 0.39                                                               | 1.1      | 0.29    |
| $\text{MnFe}_2\text{O}_4\text{@CTAB}$ | 0.25                                                               | 0.33     | 0.064   |
| $\text{Mn}_x\text{O}_y\text{@OP}$     | 0.050                                                              | 0.047    | 0.96    |
| $\text{Fe}_3\text{O}_4\text{@OP}$     | 0.045                                                              | 0.065    | 0.81    |
| $\text{MnFe}_2\text{O}_4\text{@OP}$   | 0.063                                                              | 0.12     | 0.35    |



Table S2. Composition of synthesized ground water and sea water. The carbonate system including bicarbonate, carbonic acid, carbonate, and carbon dioxide, was not included in this solution chemistry. The pH of synthesized solution was adjusted using HNO<sub>3</sub> and NaOH.

|                               | Ground water<br>pH 7.0 ± 0.2 | Sea water<br>pH 7.0 ± 0.2 |
|-------------------------------|------------------------------|---------------------------|
| Ion                           | mM                           | mM                        |
| Cl <sup>-</sup>               | 6.6                          | 564.1                     |
| Na <sup>+</sup>               | 7                            | 488.9                     |
| K <sup>+</sup>                | -                            | 8.7                       |
| Mg <sup>2+</sup>              | -                            | 45.2                      |
| Ca <sup>2+</sup>              | 0.8                          | 8.6                       |
| SO <sub>4</sub> <sup>2-</sup> | 1.0                          | 27.9                      |
| Br <sup>-</sup>               | -                            | 0.6                       |

Table S3. Summary of the maximum sorption density ( $q_{max}$ , mmol/g) and Langmuir sorption constant ( $K_L$ , L/mmol) for single sorbate system.

| Solution<br>(pH 7.0 ± 0.2) | Sorbent                                    | Sorbates  |       |           |       |           |       |
|----------------------------|--------------------------------------------|-----------|-------|-----------|-------|-----------|-------|
|                            |                                            | As(V)     |       | Cr(VI)    |       | U(VI)     |       |
|                            |                                            | $q_{max}$ | $K_L$ | $q_{max}$ | $K_L$ | $q_{max}$ | $K_L$ |
| DI water                   | Comercial MnO                              | 0.0068    | 33    | 0.025     | 12    | 0.026     | 79    |
| DI water                   | Comercial Fe <sub>3</sub> O <sub>4</sub>   | 0.051     | 200   | 0.038     | 21    | 0.027     | 2100  |
| DI water                   | Comercial MnFe <sub>2</sub> O <sub>4</sub> | 0.14      | 310   | 0.025     | 65    | 0.043     | 4500  |
| DI water                   | Mn <sub>x</sub> O <sub>y</sub> @CTAB       | 0.31      | 120   | 0.45      | 93    | 0.69      | 160   |
| DI water                   | Mn <sub>x</sub> O <sub>y</sub> @OP         | 0.10      | 170   | 0.093     | 210   | 1.9       | 71    |
| DI water                   | Fe <sub>3</sub> O <sub>4</sub> @CTAB       | 0.86      | 18    | 2.5       | 20    | 0.64      | 420   |
| DI water                   | Fe <sub>3</sub> O <sub>4</sub> @OP         | 0.14      | 81    | 0.20      | 210   | 2.5       | 510   |
| DI water                   | MnFe <sub>2</sub> O <sub>4</sub> @CTAB     | 2.6       | 21    | 3.4       | 18    | 0.65      | 380   |
| DI water                   | MnFe <sub>2</sub> O <sub>4</sub> @OP       | 0.77      | 56    | 1.4       | 35    | 4.3       | 5990  |
| Ground water               | MnFe <sub>2</sub> O <sub>4</sub> @CTAB     | 0.57      | 51    | 0.051     | 280   | 0.34      | 43    |
| Ground water               | MnFe <sub>2</sub> O <sub>4</sub> @OP       | 0.48      | 63    | 0.027     | 110   | 2.2       | 54    |
| Sea water                  | MnFe <sub>2</sub> O <sub>4</sub> @CTAB     | 0.34      | 200   | 0         | N.A.  | 0.099     | 310   |
| Sea water                  | MnFe <sub>2</sub> O <sub>4</sub> @OP       | 0.039     | 950   | 0         | N.A.  | 1.0       | 61    |

Table S4. Summary of the maximum sorption density ( $q_{max}$ , mmol/g) and Langmuir sorption constant ( $K_L$ , L/mmol) for multi sorbate system.

| Solution<br>(pH 7.0 ±<br>0.2) | Sorbates             | Sorbent                                | Sorbate   |       |           |       |           |       |
|-------------------------------|----------------------|----------------------------------------|-----------|-------|-----------|-------|-----------|-------|
|                               |                      |                                        | As(V)     |       | Cr(VI)    |       | U(VI)     |       |
|                               |                      |                                        | $q_{max}$ | $K_L$ | $q_{max}$ | $K_L$ | $q_{max}$ | $K_L$ |
| DI water                      | As(V), Cr(VI)        | MnFe <sub>2</sub> O <sub>4</sub> @OP   | 0.83      | 33    | 0.23      | 66    | N.A.      | N.A.  |
|                               | Cr(VI), U(VI)        |                                        | N.A.      | N.A.  | 0.17      | 100   | 3.8       | 440   |
|                               | As(V), Cr(VI), U(VI) |                                        | N.A.      | N.A.  | 0.097     | 490   | N.A.      | N.A.  |
|                               | As(V), Cr(VI)        | MnFe <sub>2</sub> O <sub>4</sub> @CTAB | 2.7       | 22    | 1.6       | 31    | N.A.      | N.A.  |
|                               | Cr(VI), U(VI)        |                                        | N.A.      | N.A.  | 3.4       | 27    | 0.82      | 34    |
|                               | As(V), Cr(VI), U(VI) |                                        | N.A.      | N.A.  | 1.5       | 31    | N.A.      | N.A.  |
